# Supplementary material
Source: HighWire-hosted journal article supplement (https://www.cancerbiomed.org/content/19/5/685)
Supplement: media-1 [file media-1.pdf]

## Supplementary material

**Table S1** The RT-qPCR primers

---

|        |         |                        |
|--------|---------|------------------------|
| PRKDC  | Forward | TTCTCAAGGAAGAAGGTGTCTC |
|        | Reverse | CAATGAACGTGTTGTAGCACTC |
| CHEK1  | Forward | CTCAAGTTTTGGCGGGAAAAG  |
|        | Reverse | AAGTTGAACTTCTCCATAGGCA |
| CDC25A | Forward | CGAGTCAACAGATTCAGGTTTC |
|        | Reverse | CGATGAGCTGAAAGATGTCATG |
| ORC6   | Forward | GAGGAAAGCAGAGGAGTACTTG |
|        | Reverse | CAGCTCTGATATGTCTCCTTGT |
| MCM3   | Forward | CTTCTAATAGGAGACCCATCCG |
|        | Reverse | AATTCATCAATGCAAACCACGC |

---
